# Supplementary material
Source: MDPI journal article supplement (https://www.mdpi.com/2073-4433/13/5/747)
Supplement: s1 [file s1]

Supplementary Material

# Differentiating Semi-Volatile and Solid Particle Events Using Low-Cost Lung-Deposited Surface Area and Black Carbon Sensors

Molly J. Haugen, Ajit Singh, Dimitrios Bousiotis, Francis D. Pope and Adam M. Boies

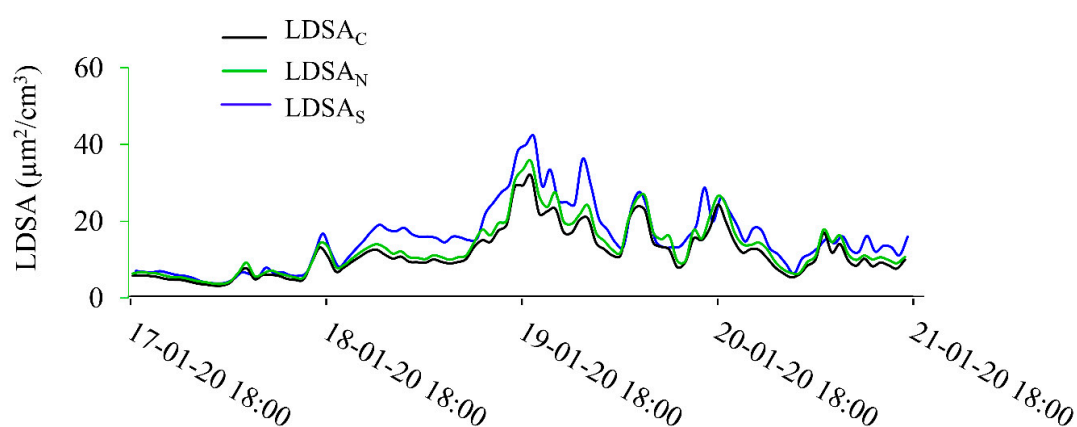

**Figure S1.** LDSA<sub>S</sub> (blue), LDSA<sub>N</sub> (green), LDSA<sub>C</sub> (black) shown for Period 1 to highlight relative LDSA sampled with laboratory grade instrumentation and low-cost sensors.

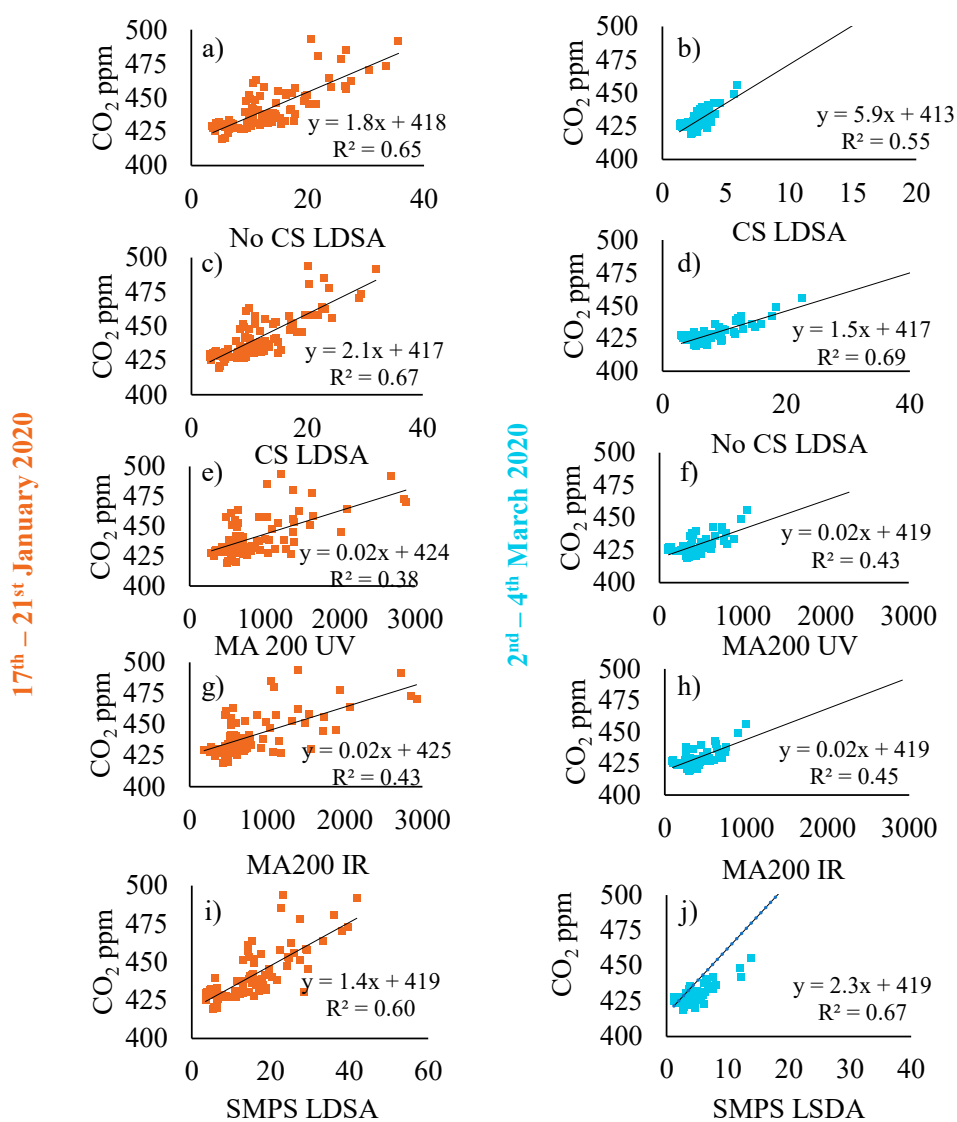

**Figure S2.** Correlation between instruments and CO<sub>2</sub> for the two sampling periods.

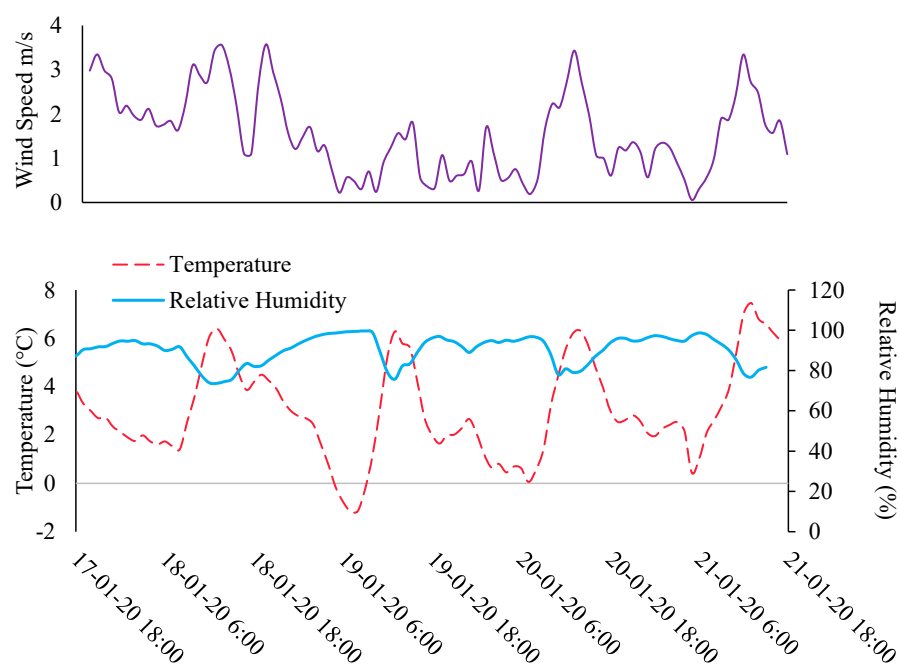

**Figure S3.** Meteorological Office data for wind speed, temperature, and relative humidity from 17<sup>th</sup> January 2020 at 18:00 to 21<sup>st</sup> January 2020 at 18:00.

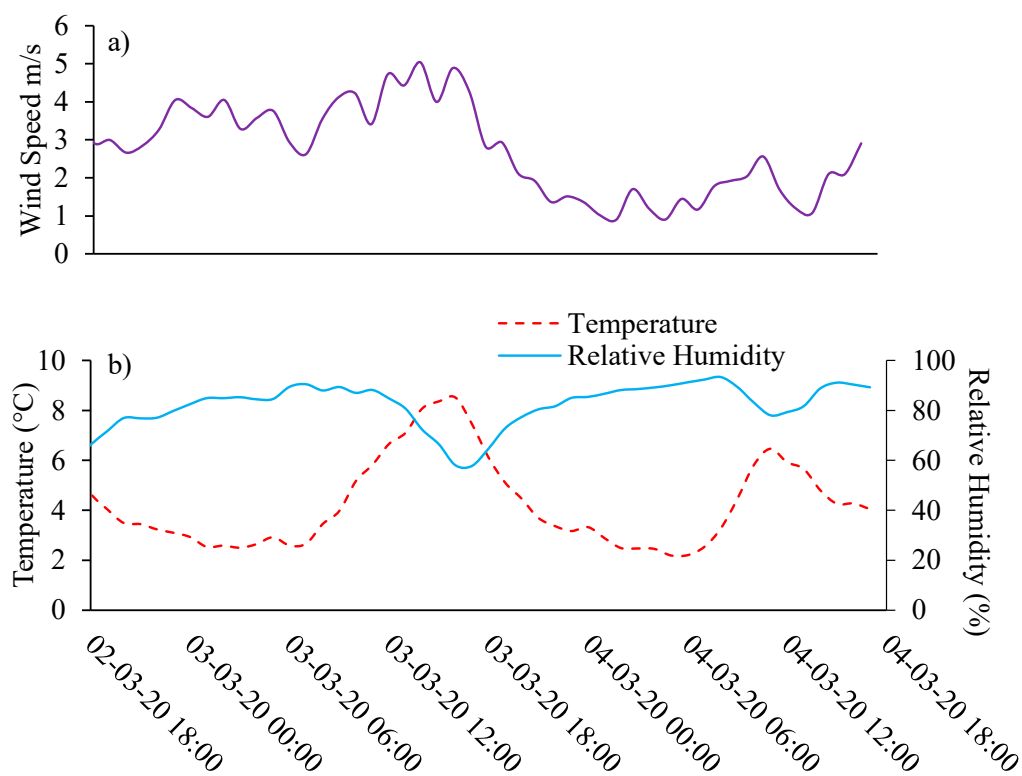

**Figure S4.** Meteorological Office data for wind speed, temperature, and relative humidity from 2<sup>nd</sup> March 2020 at 18:00 to 4<sup>th</sup> March 2020 18:00.

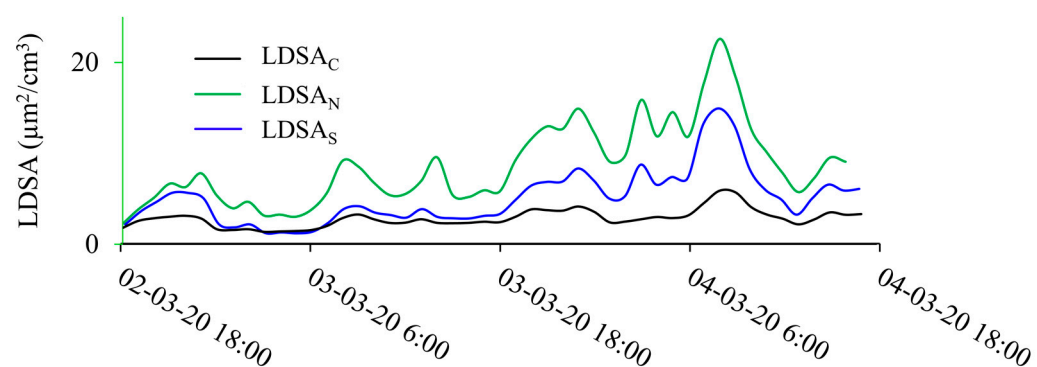

**Figure S5.** LDSA<sub>S</sub> (blue), LDSA<sub>N</sub> (green), LDSA<sub>C</sub> (black) shown for Period 2 to highlight relative LDSA sampled with laboratory grade instrumentation and low-cost sensors.
